# Supplementary material
Source: publisher figshare collection journal article supplement (https://gsajournals.figshare.com/articles/dataset/_/9626636)
Supplement: Supplementary file 1 [file 1]

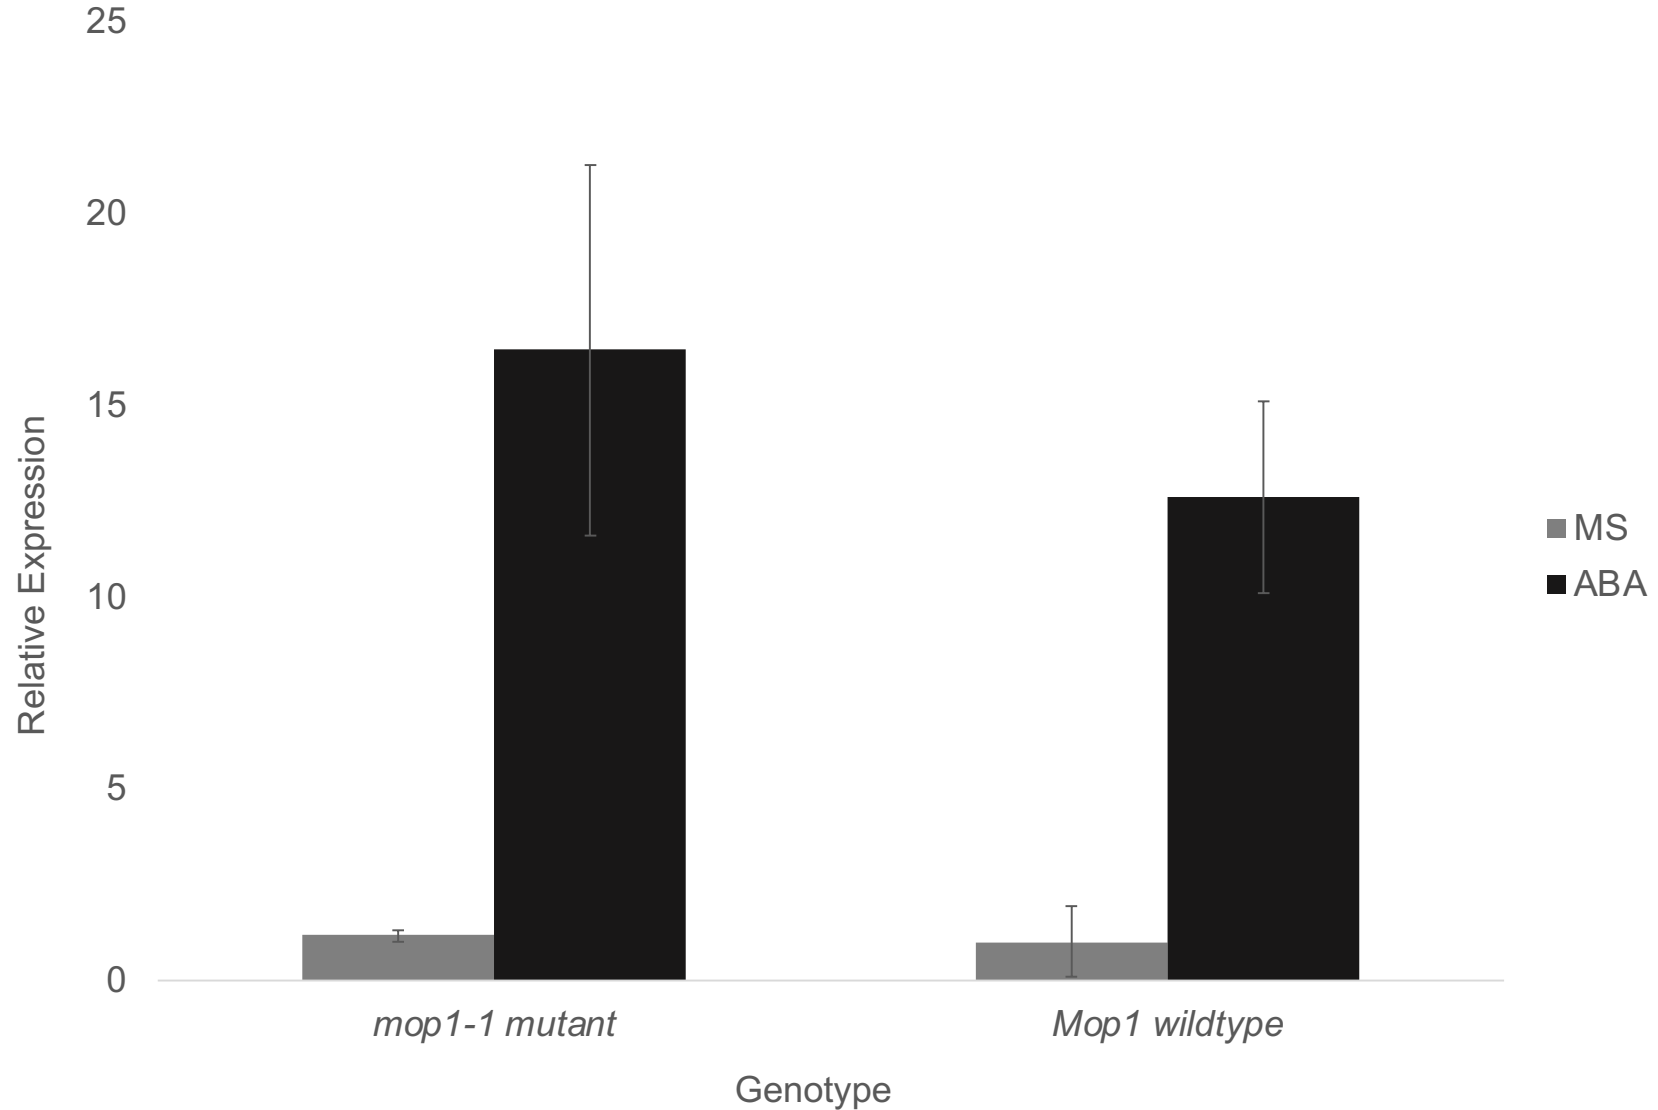

**Figure S1.** Reverse Transcriptase quantitative PCR (RT-qPCR) of the *Rab17* gene. Relative expression of the ABA-responsive *Rab17* gene (Zm00001d037894; *Dehydrin1*, *Dhn1*) in *Mop1* wildtype and *mop1-1* mutant under ABA and MS treatment. Three biological replicates were used per experiment. Error bars depict standard deviation. *Ubiquitin conjugase* was used as normalizer.

(a)

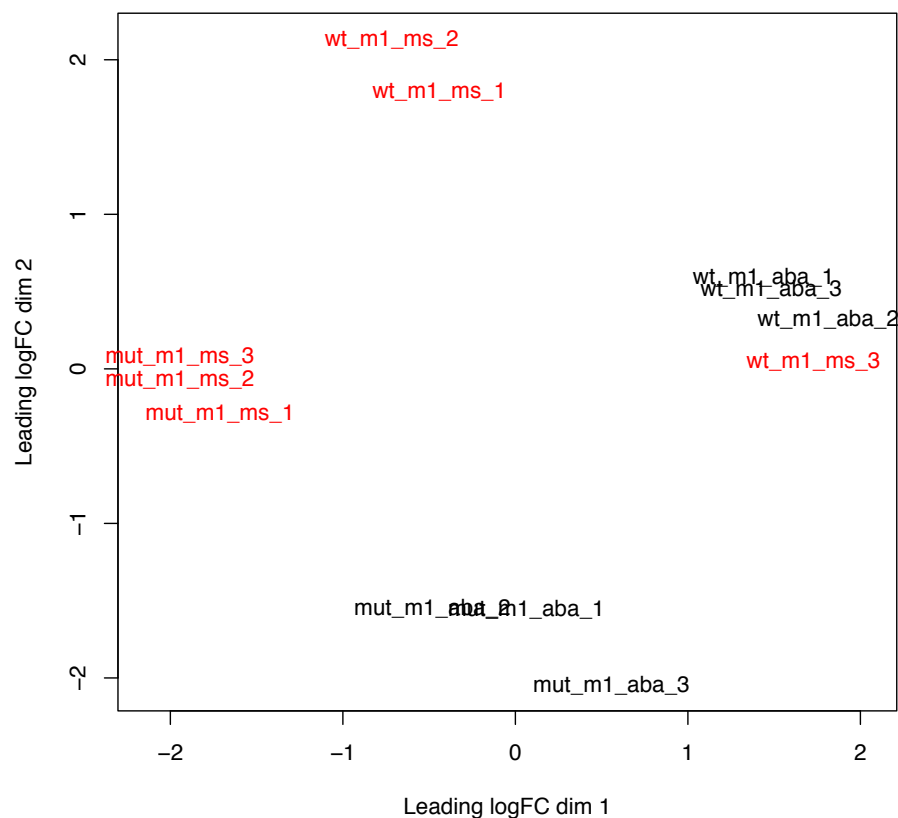

(b)

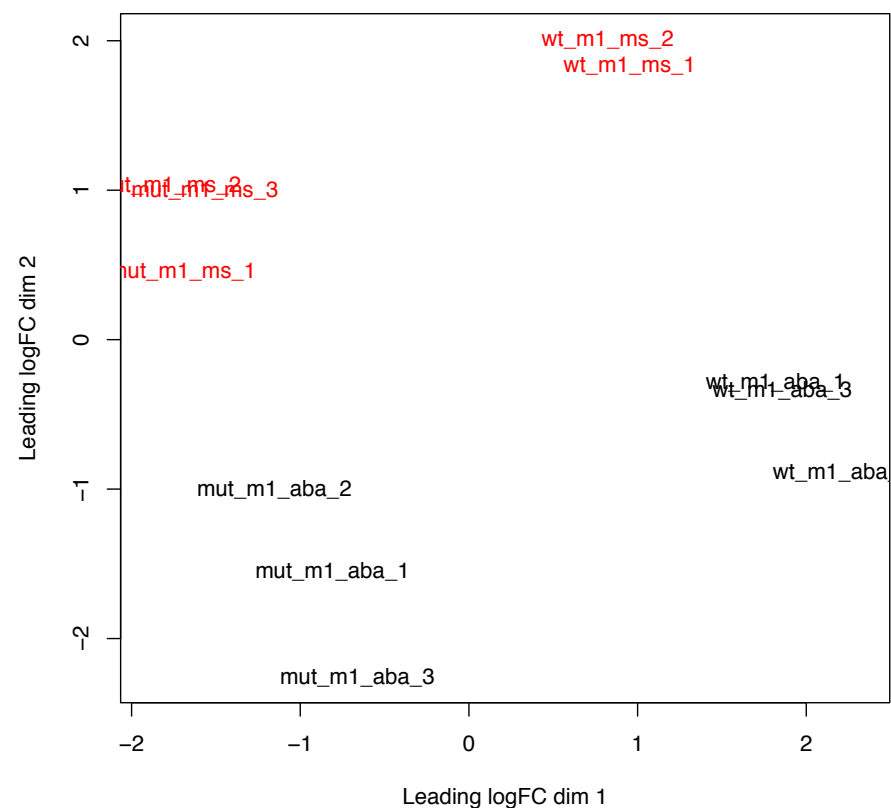

**Figure S2.** Multi-dimensional scaling (MDS) plots of RNA-seq samples.

The MDS plots generated in 'edgeR' after differential expression analysis, visualizes the differences between expression profiles of the different samples in two dimensions.

(a) Complete set of 12 RNA-seq samples including two genotypes (wildtype (wt) and mutant (mut)) and two treatments (aba and ms) with three biological replicates each (1, 2, 3).

(b) MDS plot with the 11 samples after removal of the outlier (wt\_m1\_ms\_3).

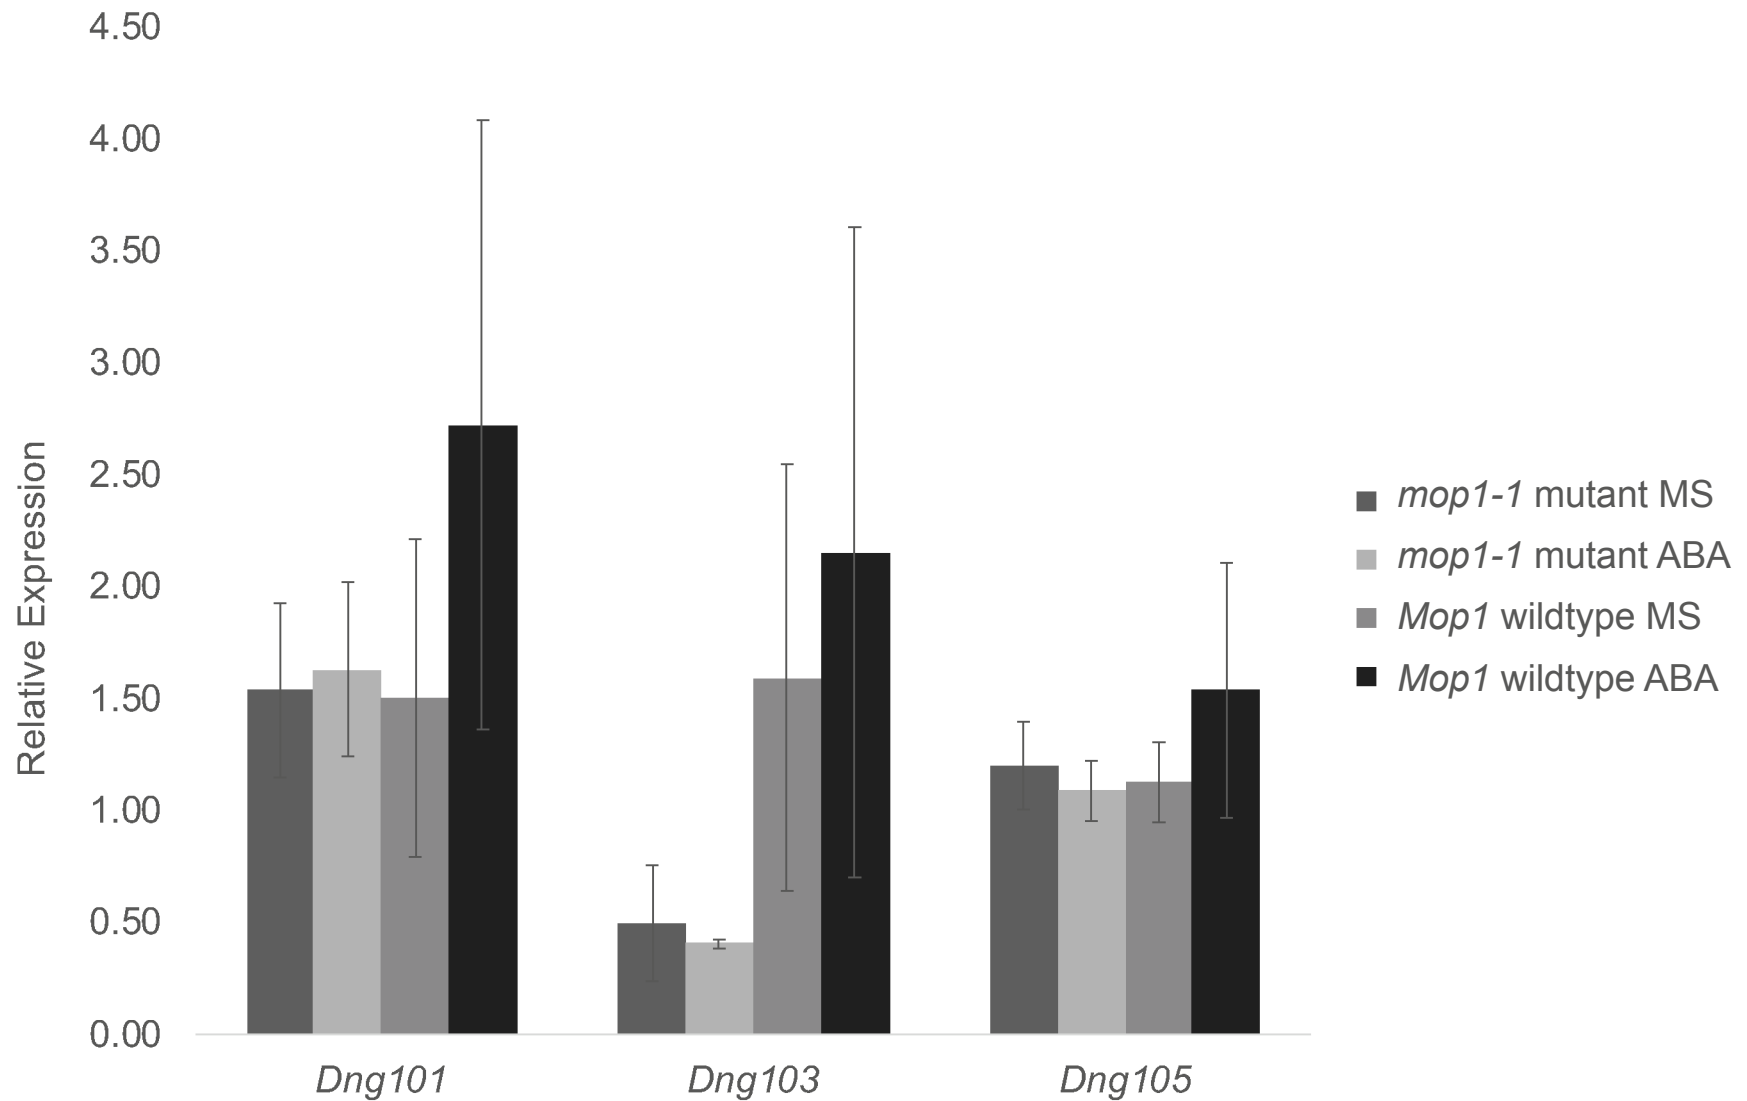

**Figure S3.** Reverse Transcriptase quantitative PCR (RT-qPCR) of the *DNG* genes. Relative expression of *Dng101* (Zm00010a020199), *Dng103* (Zm00001d038302), *Dng105* (Zm00001d016521) in *Mop1* wildtype and *mop1-1* mutant under ABA and MS treatment. Three biological replicates were used per experiment, except for *Mop1* wildtype MS for which the outlier wt ms 3 was removed. Error bars depict standard deviation. Ubiquitin conjugase was used for normalization.

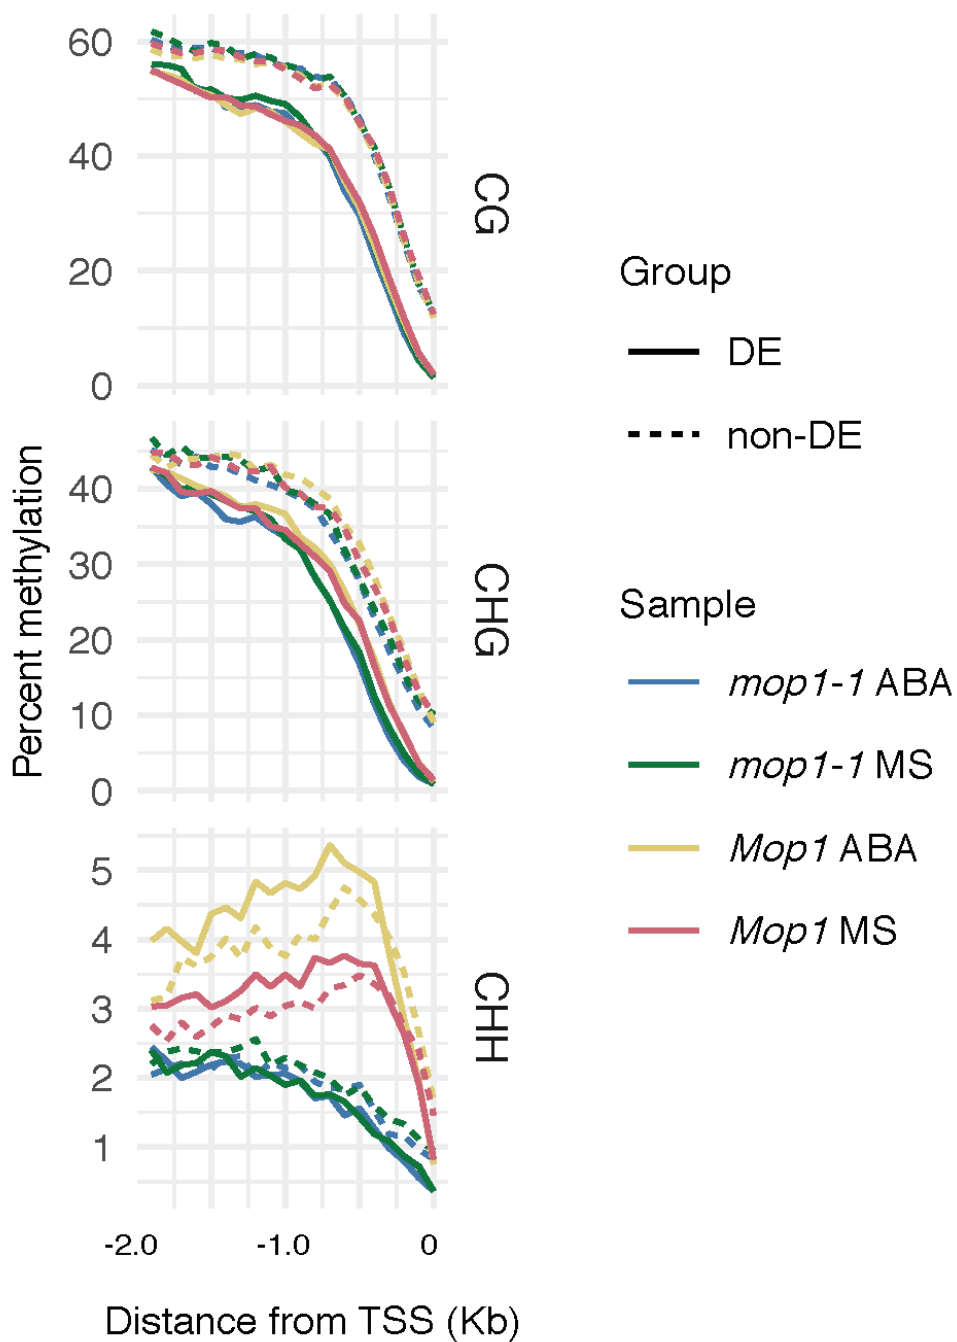

**Figure S4.** Promoter DNA methylation for *Mop1* wildtype and *mop1-1* mutant seedlings in response to abscisic acid for differentially expressed (DE) genes and non-DE genes.

Promoter methylation (2 Kb upstream from TSS) for four samples (two genotypes and two treatments) *mop1-1* mutant ABA (blue), *mop1-1* mutant MS (green), *Mop1* WT ABA (yellow), and *Mop1* WT MS (red) for ABA-responsive DE genes (Groups I, II, V, VI; n = 1957) shown as a continuous line and non-DE genes (n = 3,028) shown as a dotted line.

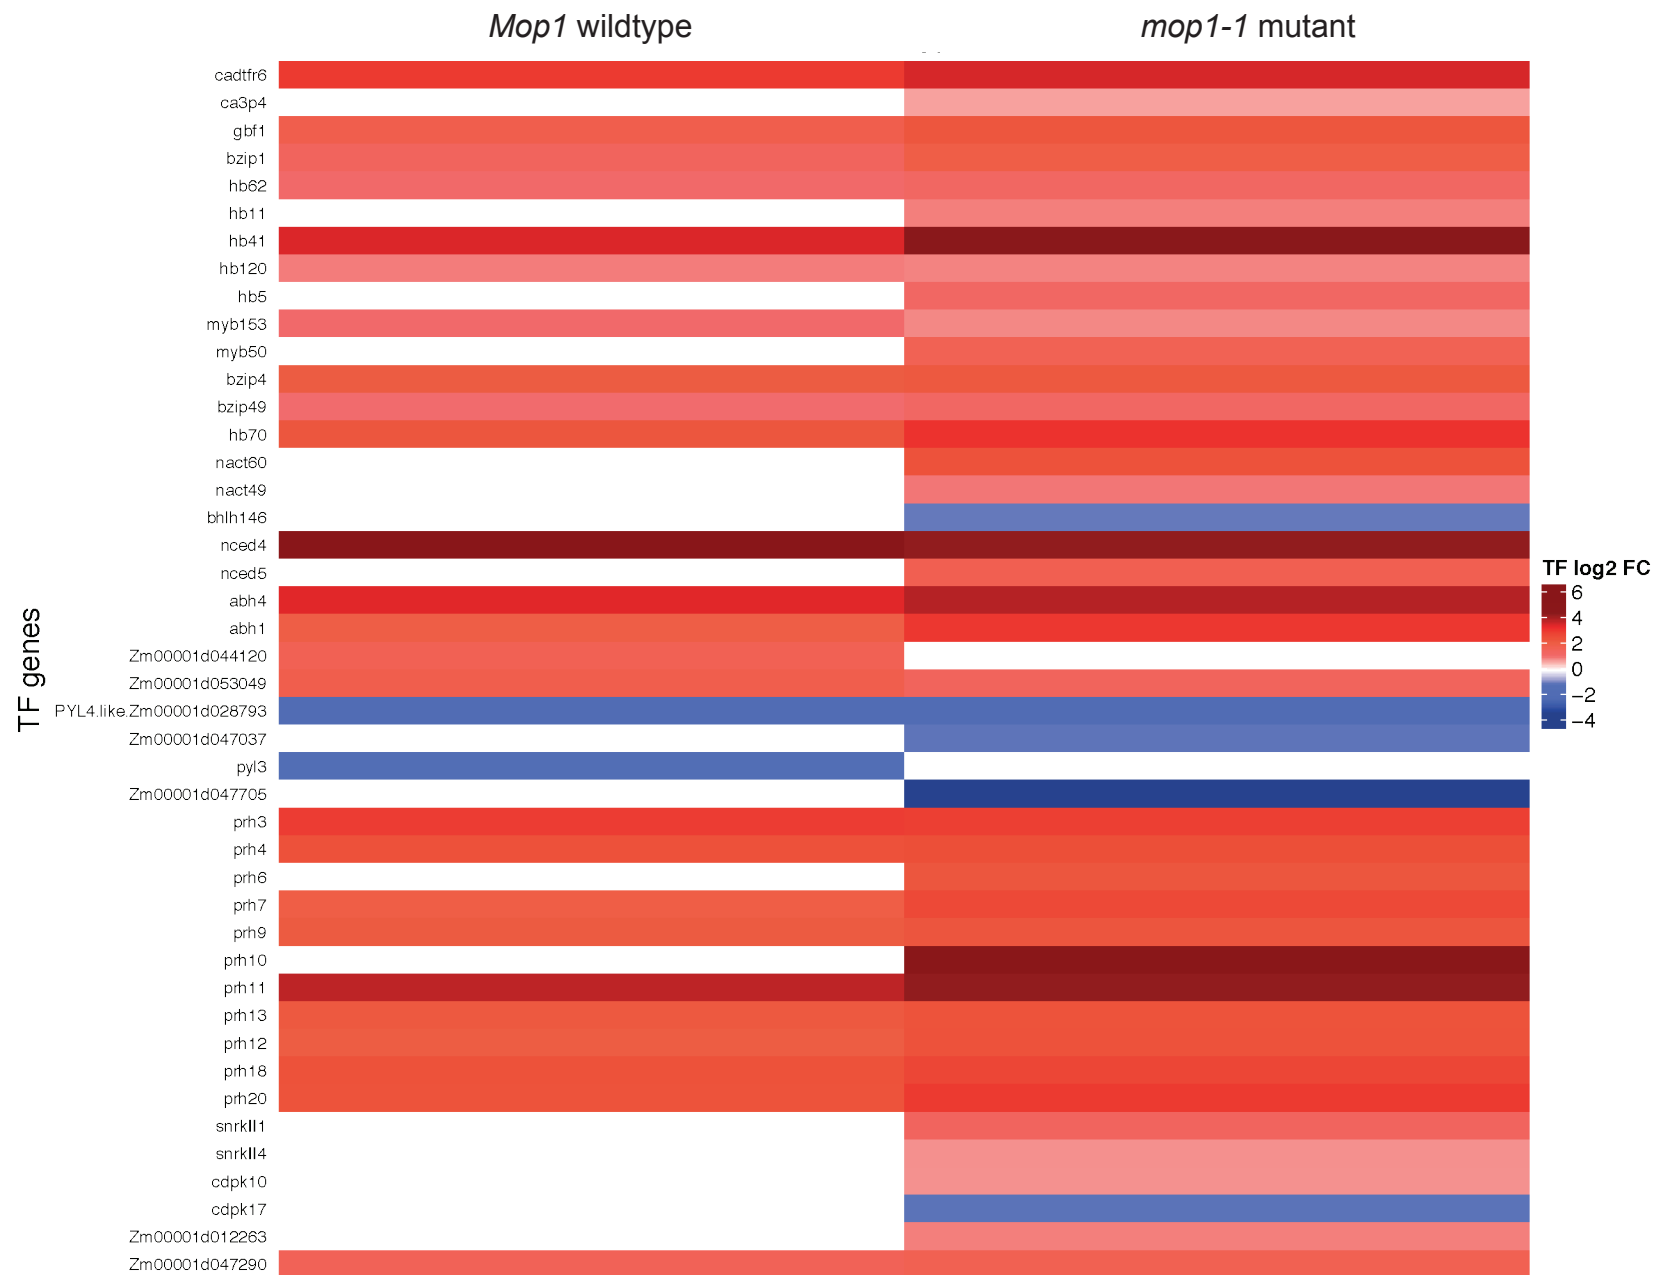

**Figure S5.** Heatmap depicting the expression level of differentially expressed genes present in the maize transcription factor hierarchical network (Figure 3) in response to ABA in the two genotypes *Mop1* wildtype and *mop1-1* mutant. Gene expression change is presented in Log2 FC.

**Table S1. Differential Expression Analysis with different biological replicate number for each genotype/treatment**

- I. DEGs Published in this paper. Removal of one biological replicate for *Mop1* wildtype MS (wt\_m1\_ms\_3). Total of 11 samples.

| DEGs            | <i>mop1-1</i> mutant ABA vs <i>mop1-1</i> mutant MS | <i>Mop1</i> wildtype ABA vs <i>Mop1</i> wildtype MS | <i>mop1-1</i> mutant ABA vs <i>Mop1</i> wildtype ABA | <i>mop1-1</i> mutant MS vs <i>Mop1</i> wildtype MS |
|-----------------|-----------------------------------------------------|-----------------------------------------------------|------------------------------------------------------|----------------------------------------------------|
| Downregulated   | 1,607                                               | 422                                                 | 59                                                   | 47                                                 |
| Non-significant | 25,254                                              | 27,344                                              | 28,116                                               | 28,199                                             |
| Upregulated     | 1,511                                               | 606                                                 | 197                                                  | 126                                                |
| Total           | 3,118                                               | 1,028                                               | 256                                                  | 173                                                |

- II. Additional removal of one biological replicate for *mop1-1* mutant MS (mut\_m1\_ms\_1). Total of 10 samples.

| DEGs            | <i>mop1-1</i> mutant ABA vs <i>mop1-1</i> mutant MS | <i>Mop1</i> wildtype ABA vs <i>Mop1</i> wildtype MS | <i>mop1-1</i> mutant ABA vs <i>Mop1</i> wildtype ABA | <i>mop1-1</i> mutant MS vs <i>Mop1</i> wildtype MS |
|-----------------|-----------------------------------------------------|-----------------------------------------------------|------------------------------------------------------|----------------------------------------------------|
| Downregulated   | 1,345                                               | 400                                                 | 64                                                   | 30                                                 |
| Non-significant | 25,829                                              | 27,284                                              | 28,022                                               | 28,138                                             |
| Upregulated     | 1,078                                               | 568                                                 | 166                                                  | 84                                                 |
| Total           | 2,423                                               | 968                                                 | 230                                                  | 114                                                |

- III. Differential Expression Analysis using two biological replicates for each genotype/treatment

| Genotype             | ABA Treatment              | MS Treatment (control)   |
|----------------------|----------------------------|--------------------------|
| <i>Mop1</i> wildtype | wt_m1_aba_1, wt_m1_aba_3   | wt_m1_ms_1, wt_m1_ms_2   |
| <i>mop1-1</i> mutant | mut_m1_aba_1, mut_m1_aba_2 | mut_m1_ms_2, mut_m1_ms_3 |

| DEGs            | <i>mop1-1</i> mutant ABA vs <i>mop1-1</i> mutant MS | <i>Mop1</i> wildtype ABA vs <i>Mop1</i> wildtype MS | <i>mop1-1</i> mutant ABA vs <i>Mop1</i> wildtype ABA | <i>mop1-1</i> mutant MS vs <i>Mop1</i> wildtype MS |
|-----------------|-----------------------------------------------------|-----------------------------------------------------|------------------------------------------------------|----------------------------------------------------|
| Downregulated   | 305                                                 | 52                                                  | 14                                                   | 22                                                 |
| Non-significant | 27,372                                              | 27,814                                              | 27,932                                               | 27,916                                             |
| Upregulated     | 305                                                 | 116                                                 | 36                                                   | 44                                                 |
| Total           | 610                                                 | 168                                                 | 50                                                   | 66                                                 |

**Table S2. Maize protein phosphatase class A (PP2C-A) differentially regulated genes in *Mop1* wildtype and *mop1-1* mutant.**

| Protein phosphatase homolog | AGPv3 ID      | AGPv4 ID       | Alternative gene or protein names                                                                                                                                                              | Present in Group |
|-----------------------------|---------------|----------------|------------------------------------------------------------------------------------------------------------------------------------------------------------------------------------------------|------------------|
| <i>Prh3</i> †               | GRMZM2G059453 | Zm00001d042886 | <i>prh3</i> , protein phosphatase 2C, ZmOrphan355, ZmPP2C3, ZmPP2C-A1                                                                                                                          | I, V             |
| <i>Prh4</i> †               | GRMZM2G166297 | Zm00001d012401 | PP2C20 probable protein phosphatase 2C 9, <i>prh4</i> , ZmOrphan11, ZmPP2C6, ZmPP2C-A2                                                                                                         | I, V             |
| <i>Prh5</i>                 | GRMZM2G010855 | Zm00001d028574 | PP2C14 2C-type protein phosphatase protein, <i>prh5</i> , ZmOrphan122, ZmPP2C14, ZmPP2C-A3                                                                                                     | I, V             |
| <i>Prh6</i> #               | GRMZM2G308615 | Zm00001d020100 | <i>prh6</i> , ZmOrphan320, ZmPP2C11, ZmPP2C-A4                                                                                                                                                 | V                |
| <i>Prh7</i> ‡§              | GRMZM2G082487 | Zm00001d005609 | PP2C16, <i>prh7</i> , probable protein phosphatase 2C 68, ZmOrphan328, ZmPP2C16, ZmPP2C-A5                                                                                                     | I, V             |
| <i>Prh9</i> #               | GRMZM5G818101 | Zm00001d009626 | PP2C12 putative protein phosphatase 2C family protein, <i>prh9</i> , ZmOrphan142, ZmPP2C12, ZmPP2C-A7                                                                                          | I, V             |
| <i>Prh10</i> ‡§             | GRMZM2G019819 | Zm00001d004357 | PP2C8, <i>prh10</i> , probable protein phosphatase 2C 37, ZmOrphan262, ZmPP2C8, ZmPP2C-A8                                                                                                      | V                |
| <i>Prh11</i> †‡§            | GRMZM2G159811 | Zm00001d025055 | Orphan337 probable protein phosphatase 2C 37, PP2C13, <i>prh11</i> , ZmOrphan337, ZmPP2C13, ZmPP2C-A9                                                                                          | I, V             |
| <i>Prh12</i>                | GRMZM2G177386 | Zm00001d038846 | <i>pco092707</i> , <i>pco092707</i> (520), PHM2108, PP2C4 2C-type protein phosphatase protein, <i>prh12</i> , PZA01468, rs130444556, rs55625585, ss196416494, ZmOrphan249, ZmPP2C4, ZmPP2C-A10 | I, V             |
| <i>Prh13</i> ¶              | GRMZM2G134628 | Zm00001d044301 | <i>magi100654</i> , <i>prh13</i> , ZmOrphan56, ZmPP2C2, ZmPP2C-A11                                                                                                                             | I, V             |
| <i>Prh18</i>                | GRMZM2G437575 | Zm00001d011132 | <i>prh18</i> , probable protein phosphatase 2C 50, ZmOrphan140, ZmPP2C5                                                                                                                        | I, V             |
| <i>Prh20</i>                | GRMZM2G300125 | Zm00001d011495 | <i>prh19</i> , protein phosphatase 2C ABI1, ZmOrphan154, ZmPP2C15                                                                                                                              | I, V             |

(Xiang et al., 2017)

- † Early stress response in shoot
- ‡ Early stress response in roots
- § Low basal expression across tissues
- ¶ High basal expression across tissues
- # Extremely susceptible to drought stress
- || Associated with drought tolerance. Its overexpression caused ABA signaling inhibition

**Table S3.** Number of differentially expressed genes (DEGs) in the four groups, number of identified annotated DEGs and number of significant GO terms found for each.

| Pair-wise comparison          | Analysis group | Expression pattern | 2FC Significant Query DEGs | Annotated DEGs | Significant GO terms |
|-------------------------------|----------------|--------------------|----------------------------|----------------|----------------------|
| <i>Mop1</i> wildtype ABA / MS | I              | upregulated        | 506                        | 470            | 17                   |
|                               | II             | downregulated      | 352                        | 304            | 11                   |
| <i>mop1-1</i> mutant MS /     | III            | upregulated        | 126                        | 57             | 0                    |
| <i>Mop1</i> wildtype MS       | IV             | downregulated      | 47                         | 32             | 0                    |
| <i>mop1-1</i> mutant ABA / MS | V              | upregulated        | 965                        | 894            | 22                   |
|                               | VI             | downregulated      | 994                        | 892            | 28                   |
| <i>mop1-1</i> mutant ABA /    | VII            | upregulated        | 194                        | 83             | 0                    |
| <i>Mop1</i> wildtype ABA      | VIII           | downregulated      | 58                         | 44             | 0                    |

**Table S4.** High-confidence miRNAs from miRbase *Zea mays* B73\_v4 ([http://www.mirbase.org/cgi-bin/mirna\\_summary.pl?org=zma](http://www.mirbase.org/cgi-bin/mirna_summary.pl?org=zma)) used to normalize 24-nt siRNA presence in *mop1-1* mutant.

| miRNA       | Chromosomal coordinates |
|-------------|-------------------------|
| zma-MIR399f | 6:163860157-163860261   |
| zma-MIR172c | 4:174154928-174155050   |
| zma-MIR390a | 1:298107396-298107576   |
| zma-MIR396f | 5:220211653-220211769   |
| zma-MIR171e | 1:7976712-7976837       |
| zma-MIR160g | 6:94036699-94036784     |
| zma-MIR160b | 5:44296768-44296888     |
| zma-MIR171l | 1:249547375-249547452   |
| zma-MIR167e | 7:10115799-10115917     |
| zma-MIR171d | 9:128212960-128213080   |
| zma-MIR167c | 5:4414244-4414375       |
| zma-MIR159f | 3:25007834-25008048     |
| zma-MIR167i | 9:113476123-113476252   |
| zma-MIR529  | 5:164370906-164371031   |
| zma-MIR156g | 7:119411284-119411404   |
| zma-MIR159a | 8:10753073-10753318     |
| zma-MIR167h | 6:95985872-95986014     |
| zma-MIR319b | 3:2038966-2039178       |
| zma-MIR166n | 4:181112182-181112277   |
| zma-MIR166j | 7:128589394-128589547   |
| zma-MIR166i | 1:244940015-244940097   |
| zma-MIR168b | 4:244520636-244520739   |
| zma-MIR166g | 1:13782628-13782753     |
| zma-MIR166m | 5:216484037-216484192   |
| zma-MIR166k | 5:216483766-216483933   |
| zma-MIR166a | 6:87381728-87381940     |
| zma-MIR156e | 2:33005026-33005151     |
| zma-MIR166d | 5:22443534-22443637     |
| zma-MIR156l | 5:188595332-188595421   |
| zma-MIR156i | 4:140280587-140280703   |
